# Supplementary material
Source: ML conference proceedings conference paper supplement (https://openaccess.thecvf.com/content/WACV2025/html/Chen_A_Semantically_Impactful_WACV_2025_paper.html)
Supplement: Supplementary file 1 [file Chen_A_Semantically_Impactful_WACV_2025_supplemental.pdf]

# Supplementary Materials: A Semantically Impactful Image Manipulation Dataset: Characterizing Image Manipulations using Semantic Significance

Anonymous WACV Algorithms Track submission

Paper ID 1845

## A. Implementation Details

**List of negative prompts used:** lowres, text, error, cropped, worst quality, low quality, jpeg artifacts, ugly, duplicate, morbid, mutilated, out of frame, extra fingers, mutated hands, poorly drawn hands, poorly drawn face, mutation, deformed, blurry, dehydrated, bad anatomy, bad proportions, extra limbs, cloned face, disfigured, gross proportions, malformed limbs, missing arms, missing legs, extra arms, extra legs, fused fingers, too many fingers, long neck, username, watermark, signature.

## B. Observations and Discussions

### B.1. Semantically significant manipulation ranking

From a qualitative standpoint, manipulations that are more semantically significant often cover larger areas of the image compared to minor ones. For example, a burning building occupies much more space than a swapped sign or t-shirt. This size difference likely influences the models, which tend to associate larger modifications with lower similarity scores and higher semantic significance scores.

Another factor affecting the results is the variability and accuracy of the generated textual descriptions. Machine learning models can sometimes produce incorrect or inconsistent descriptions, even for the same image scene. These discrepancies can impact the performance of semantic similarity models that rely on textual inputs. Figure A1 shows an example where the description accurately captures manipulations like a burning building or a flooded street. However, some errors remain, such as incorrectly stating that cars are driving through a flood, when in reality, they are in a dry area of the image.

Figure A2 highlights instances where the generated textual descriptions fail to capture manipulations like swapped signs or broken windows. A qualitative review suggests two key reasons for the discrepancies between successful and failed cases. First, the size of the manipulation is crucial: failed cases typically involve smaller manipulations, while

successful ones feature larger changes. Second, the manipulation's impact on the image's overall atmosphere seems to play a role. In successful cases, the manipulations significantly alter the mood or context of the scene, whereas trivial changes in failed cases do not affect the scene's portrayal enough to be included in the description. This indicates that descriptions prioritize manipulations that meaningfully influence the image, often omitting minor alterations.

### B.2. Image-level manipulation localization

We also generated quantitative results for detecting image manipulation using image-level classification. This approach identifies whether an image has been manipulated by detecting the presence of manipulated regions in its binary localization mask. Images with such regions are classified as manipulated, while those without are considered pristine. The goal was to evaluate the performance of mainstream methods under less stringent conditions compared to pixel-level analysis.

The results show that image-level classification significantly outperforms pixel-level results. This suggests that conventional methods are able to find manipulation artifacts. Although a significantly lower pixel wise performance suggests that the detected manipulated regions may be incorrectly identified. As a result, this leads to a higher accuracy in image-level classification but a low pixel-based F1 score. Figure A4 provides a qualitative example of instances where mis-detection and over-detection occur.

## C. Evaluating image manipulation localization based on the manipulation size and type

To better understand the image manipulation localization results and the newly proposed semantic significance manipulation ranking task, we analyzed the evaluation outcomes based on key factors. Manipulation size is crucial to the success of many mainstream methods, as smaller manipulations are often harder to detect and localize. In our analysis, we examine how the size of manipulations af-

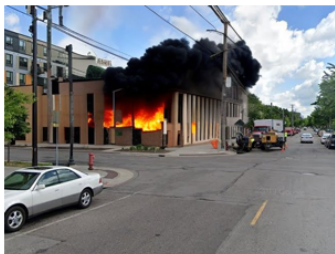

The image shows a building engulfed in flames with a significant amount of smoke billowing into the sky. The fire appears to be intense, with flames visible through the windows and the roof of the structure. There are emergency vehicles, including a fire truck, parked nearby, indicating that firefighters are on the scene to address the situation. The street in front of the building is lined with parked cars, and there are traffic lights and a fire hydrant visible. The sky is partly cloudy, suggesting that the weather is not extreme, which might be a factor in the firefighting efforts. The overall scene is one of an emergency response to a building fire.

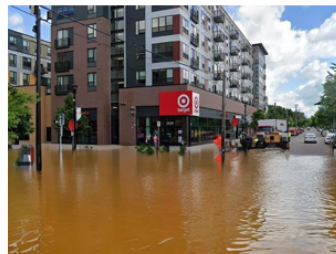

The image shows a street scene with significant flooding. The water appears to be a muddy brown color, indicating it might be mixed with sediment or debris. A Target store is visible on the left side of the image, with its sign partially submerged in the water. The street is lined with parked cars that are also partially submerged, and a few cars are driving through the flooded area. There are traffic signs and a construction barrier partially submerged as well. The buildings in the background are multi-story residential or commercial structures, and the sky is partly cloudy. The overall scene suggests that this is a result of heavy rainfall or a nearby waterway overflowing its banks.

Figure A1. Qualitative example of textual descriptions generated by ChatGPT. Text highlighted in green is text correctly describing the manipulation. Red text is incorrect statements.

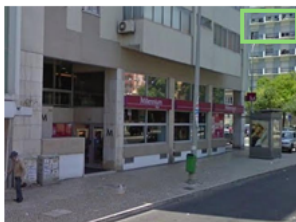

The image shows an urban street scene with a large building on the left side. The building appears to be a commercial structure with a red awning and a sign that is partially obscured, but it seems to be a store or a business establishment. The facade is made of a light-colored material, possibly concrete or stone, and it has several windows. On the right side of the image, there is a sidewalk where a person is walking, and a bus stop shelter is visible. The street is paved with what looks like cobblestones or a similar type of paving, and there are a few cars parked along the street. The sky is clear, suggesting it might be a sunny day. There are no visible trees or greenery in the immediate vicinity, which gives the scene an urban, built-up feel.

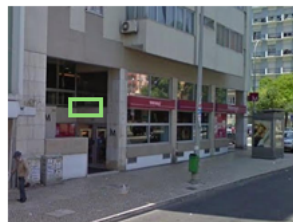

The image shows an urban street scene with a building that appears to be a commercial or office space, with large windows and a modern architectural style. The facade is beige or light brown, and there are a few visible air conditioning units on the exterior. In front of the building, there is a sidewalk where a person is walking, and a green trash can is placed on the curb. The street is paved with cobblestones, and there are parked cars along the side of the road. The sky is clear, suggesting it might be a sunny day. The overall atmosphere of the image is calm and orderly, typical of a quiet city street during the day. There are no visible people in the immediate vicinity of the building, which gives the impression of a moment of tranquility in an otherwise bustling urban environment.

Figure A2. Qualitative example of textual descriptions generated by ChatGPT. The textual descriptions do not capture the corresponding manipulations (Swap Sign, Broken Window) for the two images.

| Manipulation Localization Methods | $\mu$ Per. | $\mu$ Recall | F1   |
|-----------------------------------|------------|--------------|------|
| ManTraNet [9]                     | 0.50       | 0.99         | 0.67 |
| CAT-Net v2 [5]                    | 0.61       | 0.92         | 0.74 |
| TruFor [2]                        | 0.75       | 0.79         | 0.77 |
| CRCNN [10]                        | 0.49       | 0.41         | 0.45 |
| HiFi-Net [3]                      | 0.68       | 0.54         | 0.60 |
| IF-OSN [8]                        | 0.72       | 0.16         | 0.27 |
| ObjectFormer [7]                  | 0.39       | 0.17         | 0.23 |
| PSCC-Net [6]                      | 0.99       | 0.28         | 0.44 |
| RRU-Net [1]                       | 0.50       | 0.99         | 0.67 |
| SPAN [4]                          | 0.52       | 0.04         | 0.08 |

Table A1. Image level precision, recall, and F1 scores using both manipulated and pristine images from the gold standard set. A fixed threshold of 0.5 is used when converting to a binary mask.

ffects the performance of both mainstream and state-of-the-art (SoTA) detection and localization methods. To support

this, we included manipulations of varying sizes, with their distribution shown in Figure A3.

Quantitative results show that most SoTA methods struggle to detect manipulations produced by generative stable diffusion models. As a result, we conducted a qualitative evaluation of localization masks from methods that performed well, specifically Cat-Net [5] and TruFor [2]. Observations indicate that small manipulations involving multiple objects often face mislocalization issues, as current methods tend to focus on identifying a single manipulated region in the scene.

Additionally, there are cases where localization models fail to detect any alterations in images with multiple manipulations, regardless of manipulation size or type. Preliminary analysis suggests this issue may be related to the semantic context or metadata of the original image.

Our qualitative analysis reveals two primary reasons

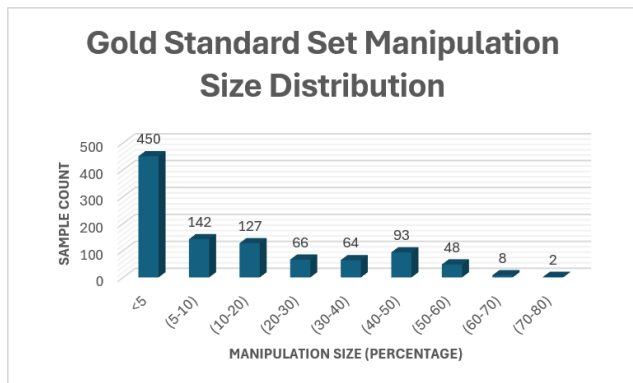

Figure A3. Distribution of manipulated images based on manipulation size

why SoTA methods struggle to localize manipulations generated by generative stable diffusion models: (1) mis-detection/over-detection of manipulation regions and (2) complete failure to detect manipulations.

Examples of these localization behaviors are shown in Figure A4, which features a military tank inserted onto a street. Methods like Cat-Net [5] and TruFor [2] successfully localized the manipulated region, while methods such as IF-OSN [8] and RRU-Net [1] mis-detected the manipulated region. Similarly, PSCC-Net [6] and Mantra-Net [9] demonstrated over-detection.

The second common issue involves methods that failed to detect any manipulations at all. Examples include CRCNN, SPAN, ObjectFormer, and Hifi-Net.

**Generative stable diffusion details:** We set the sampling size and guidance scale hyperparameters to 20 and 7.5, respectively. The generative stable diffusion model is then tasked with producing the specified manipulation, which is seamlessly integrated into the original image. Figure 2 in the main paper illustrates this process, where a building of interest is selected, and the manipulation simulates a fire, realistically portraying the house engulfed in flames. This example demonstrates our methodology’s ability to create realistic and contextually relevant image manipulations.

## D. Dataset Visual Examples

Figures A5 to A14 show visual manipulated image samples from the proposed CSI-IMD gold standard set.

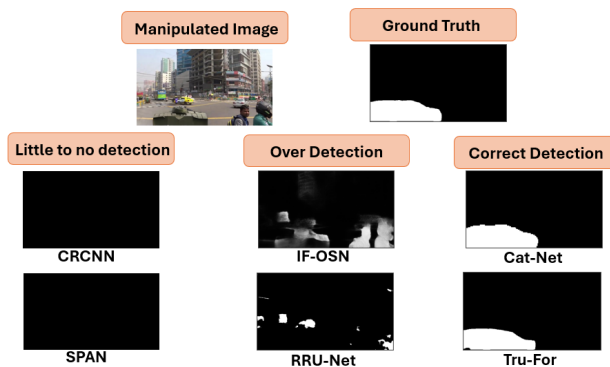

Figure A4. Qualitative example of state of the art method’s prediction localization masks. Examples of no detection, over detection, and correct detection’s are shown.

324  
325  
326  
327  
328  
329  
330  
331  
332  
333  
334  
335  
336  
337  
338  
339  
340  
341  
342  
343  
344  
345  
346  
347  
348  
349  
350  
351  
352  
353  
354  
355  
356  
357  
358  
359  
360  
361  
362  
363  
364  
365  
366  
367  
368  
369  
370  
371  
372  
373  
374  
375  
376  
377

378  
379  
380  
381  
382  
383  
384  
385  
386  
387  
388  
389  
390  
391  
392  
393  
394  
395  
396  
397  
398  
399  
400  
401  
402  
403  
404  
405  
406  
407  
408  
409  
410  
411  
412  
413  
414  
415  
416  
417  
418  
419  
420  
421  
422  
423  
424  
425  
426  
427  
428  
429  
430  
431

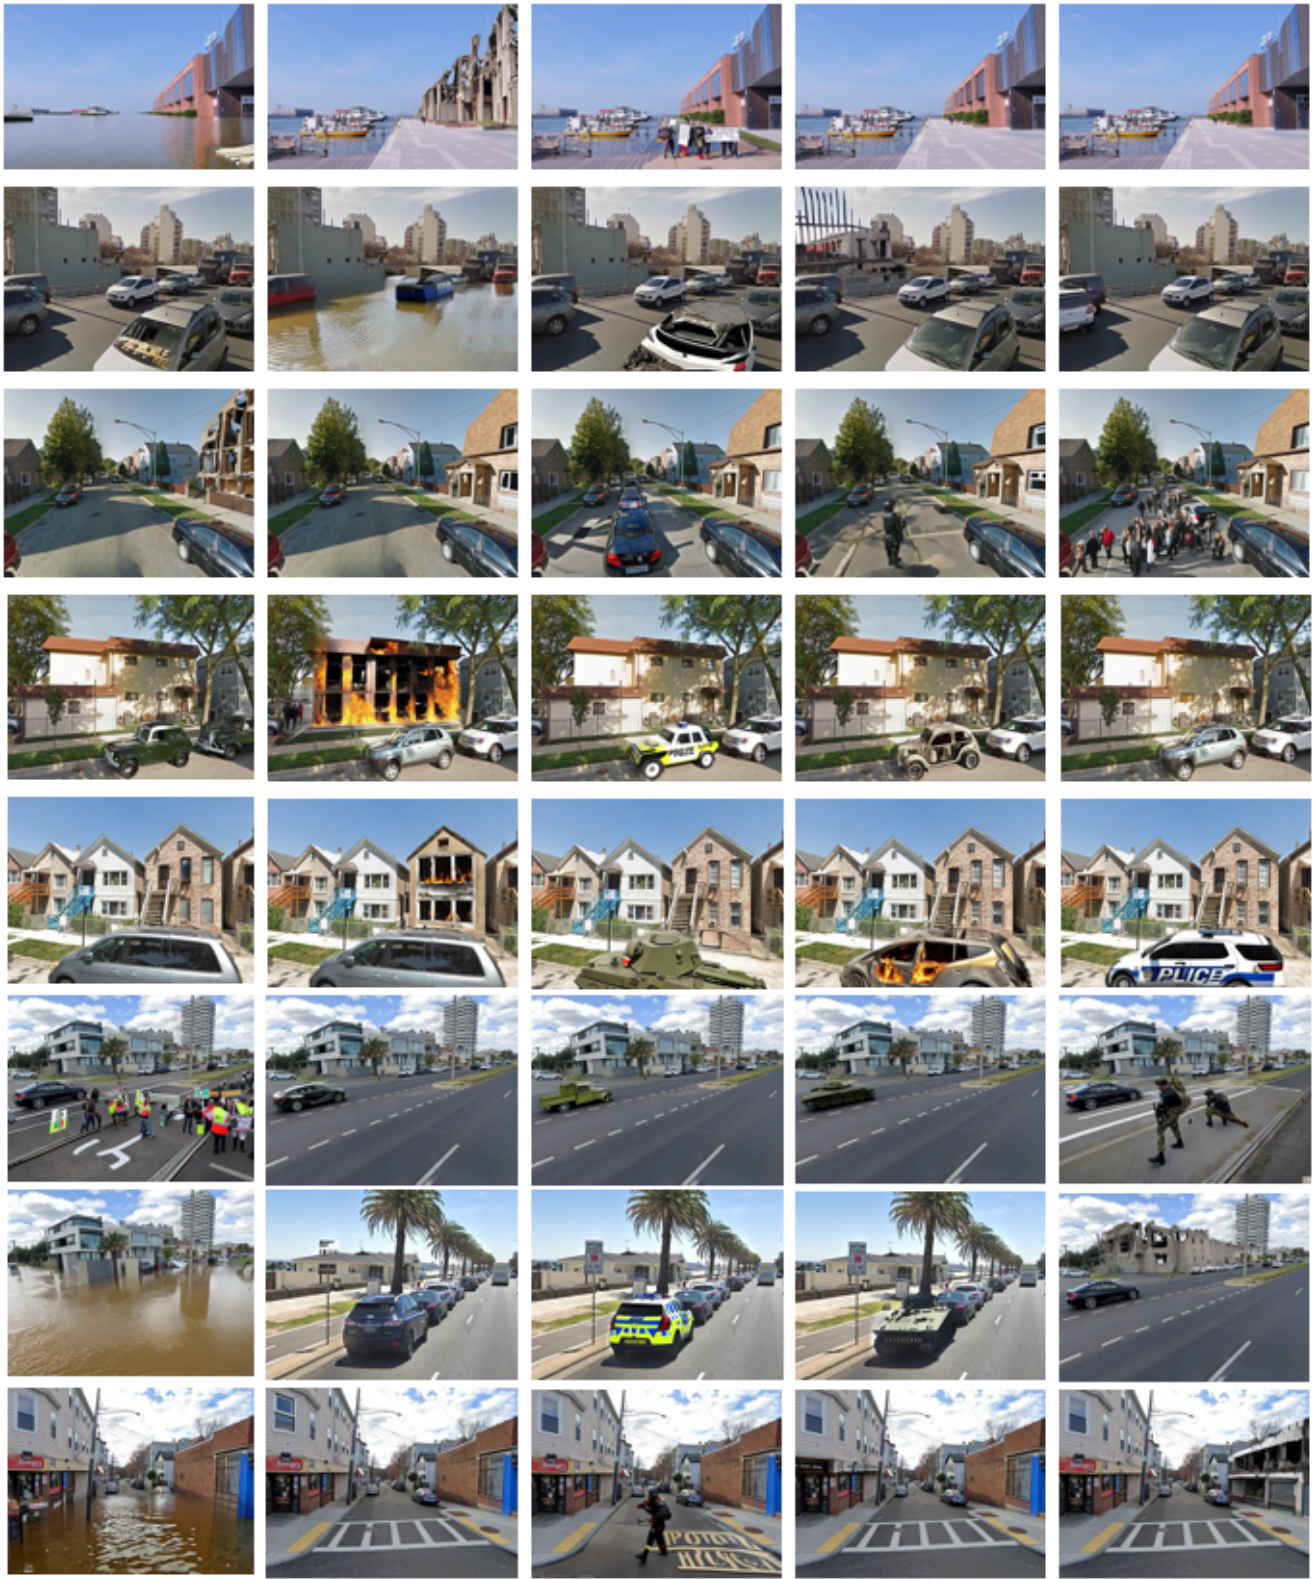

Figure A5. Examples of the manipulated images from our CSI-IMD gold standard set (1 of 10).

432  
433  
434  
435  
436  
437  
438  
439  
440  
441  
442  
443  
444  
445  
446  
447  
448  
449  
450  
451  
452  
453  
454  
455  
456  
457  
458  
459  
460  
461  
462  
463  
464  
465  
466  
467  
468  
469  
470  
471  
472  
473  
474  
475  
476  
477  
478  
479  
480  
481  
482  
483  
484  
485

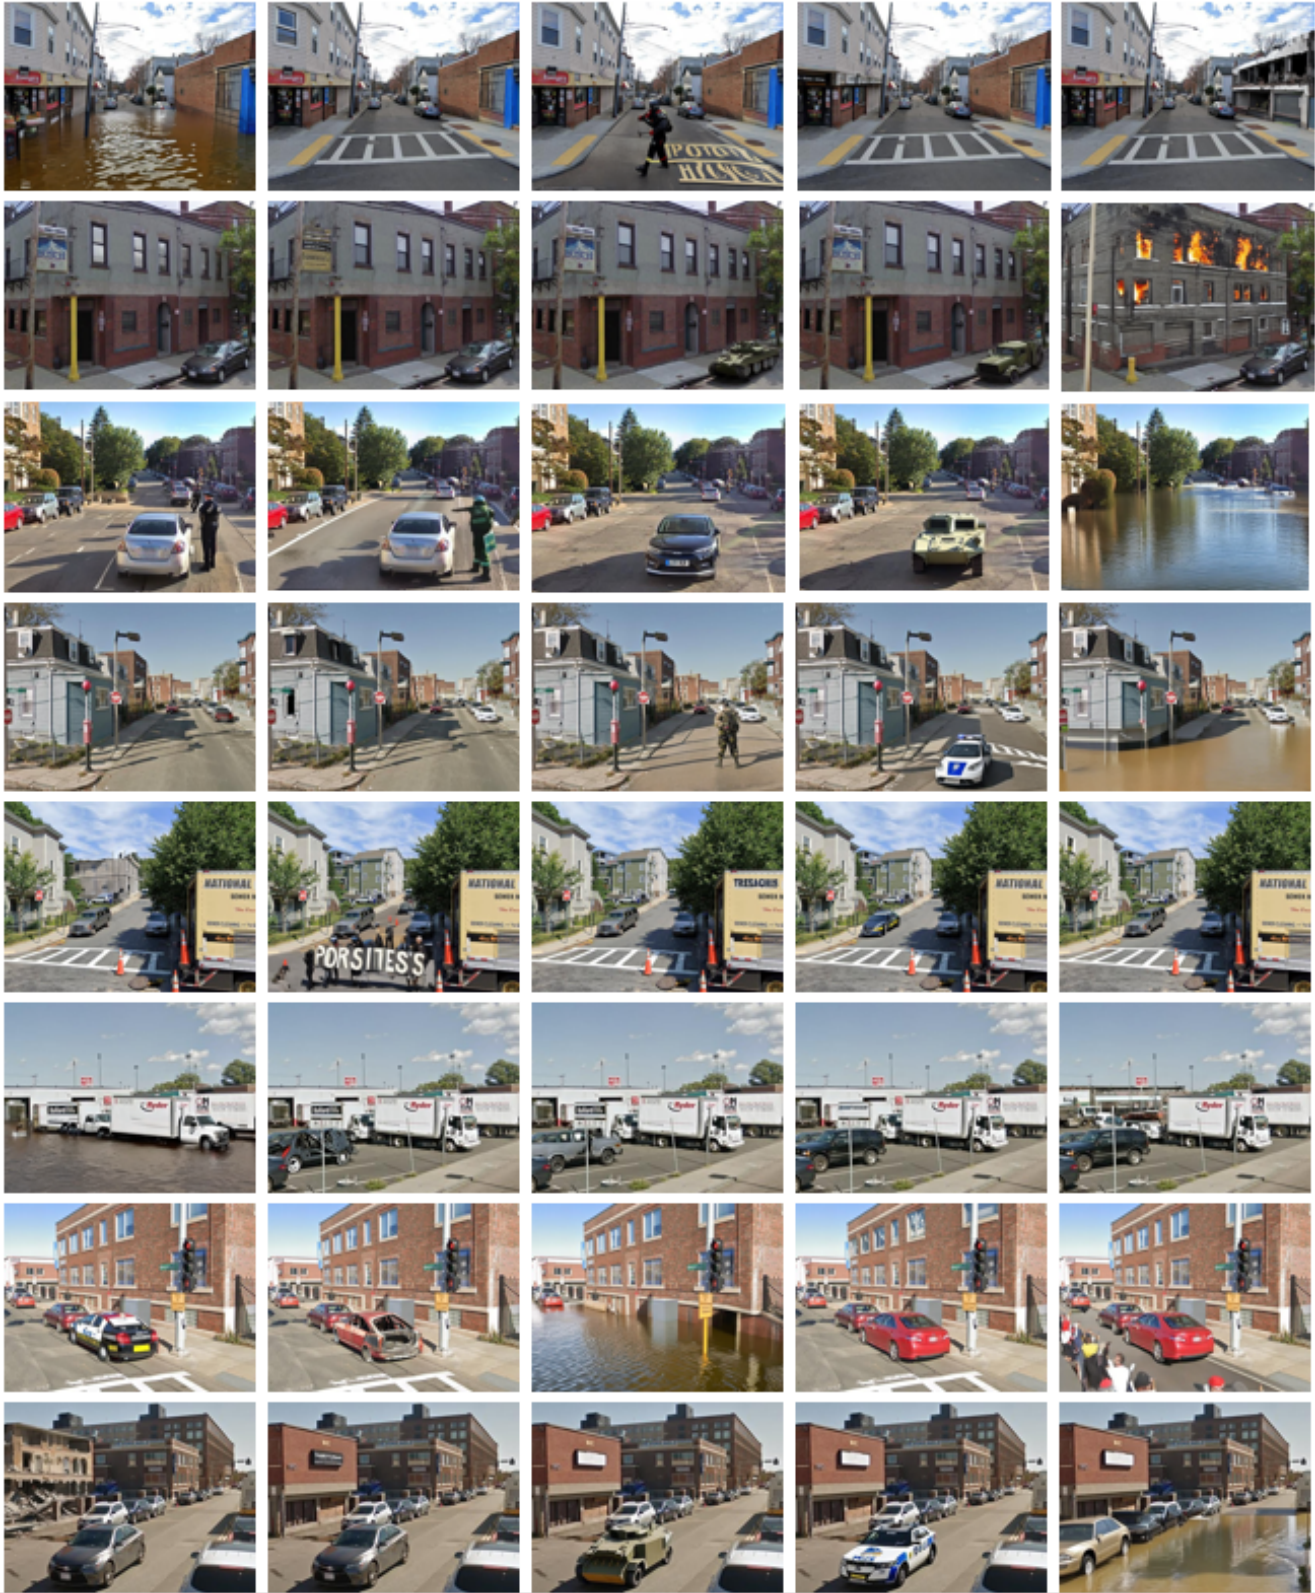

486  
487  
488  
489  
490  
491  
492  
493  
494  
495  
496  
497  
498  
499  
500  
501  
502  
503  
504  
505  
506  
507  
508  
509  
510  
511  
512  
513  
514  
515  
516  
517  
518  
519  
520  
521  
522  
523  
524  
525  
526  
527  
528  
529  
530  
531  
532  
533  
534  
535  
536  
537  
538  
539

Figure A6. Examples of the manipulated images from our CSI-IMD gold standard set (2 of 10).

540  
541  
542  
543  
544  
545  
546  
547  
548  
549  
550  
551  
552  
553  
554  
555  
556  
557  
558  
559  
560  
561  
562  
563  
564  
565  
566  
567  
568  
569  
570  
571  
572  
573  
574  
575  
576  
577  
578  
579  
580  
581  
582  
583  
584  
585  
586  
587  
588  
589  
590  
591  
592  
593

594  
595  
596  
597  
598  
599  
600  
601  
602  
603  
604  
605  
606  
607  
608  
609  
610  
611  
612  
613  
614  
615  
616  
617  
618  
619  
620  
621  
622  
623  
624  
625  
626  
627  
628  
629  
630  
631  
632  
633  
634  
635  
636  
637  
638  
639  
640  
641  
642  
643  
644  
645  
646  
647

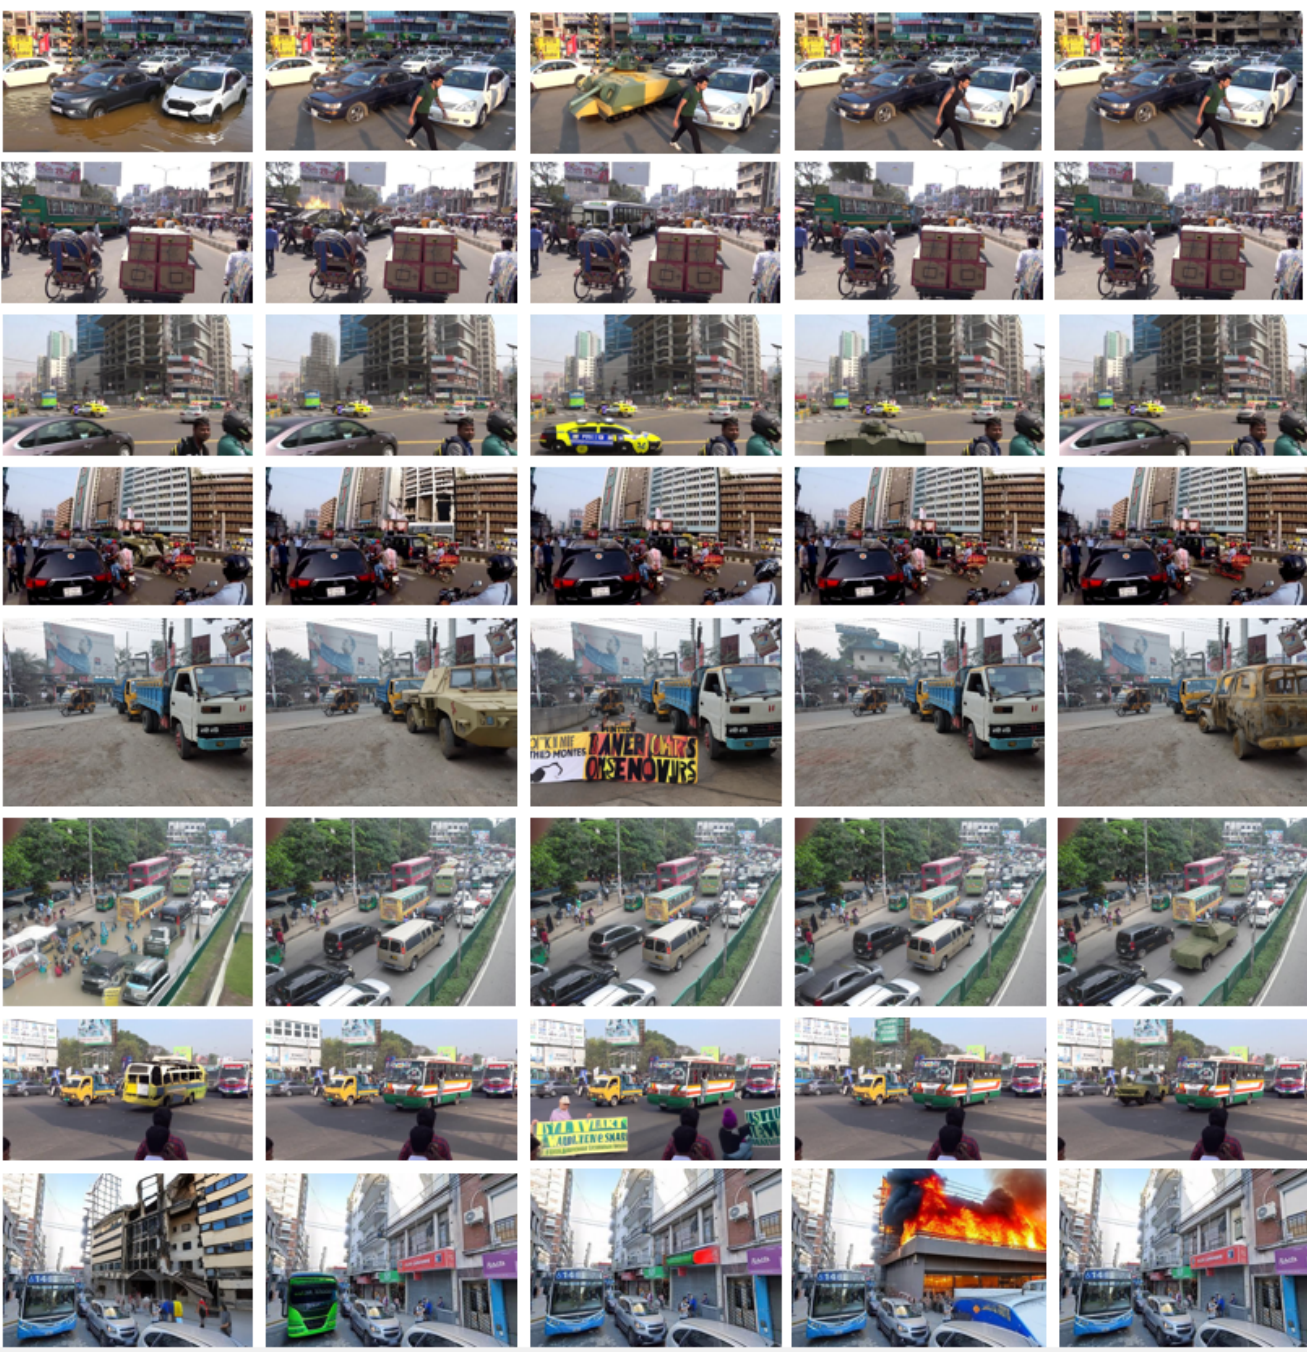

Figure A7. Examples of the manipulated images from our CSI-IMD gold standard set (3 of 10).

648  
649  
650  
651  
652  
653  
654  
655  
656  
657  
658  
659  
660  
661  
662  
663  
664  
665  
666  
667  
668  
669  
670  
671  
672  
673  
674  
675  
676  
677  
678  
679  
680  
681  
682  
683  
684  
685  
686  
687  
688  
689  
690  
691  
692  
693  
694  
695  
696  
697  
698  
699  
700  
701

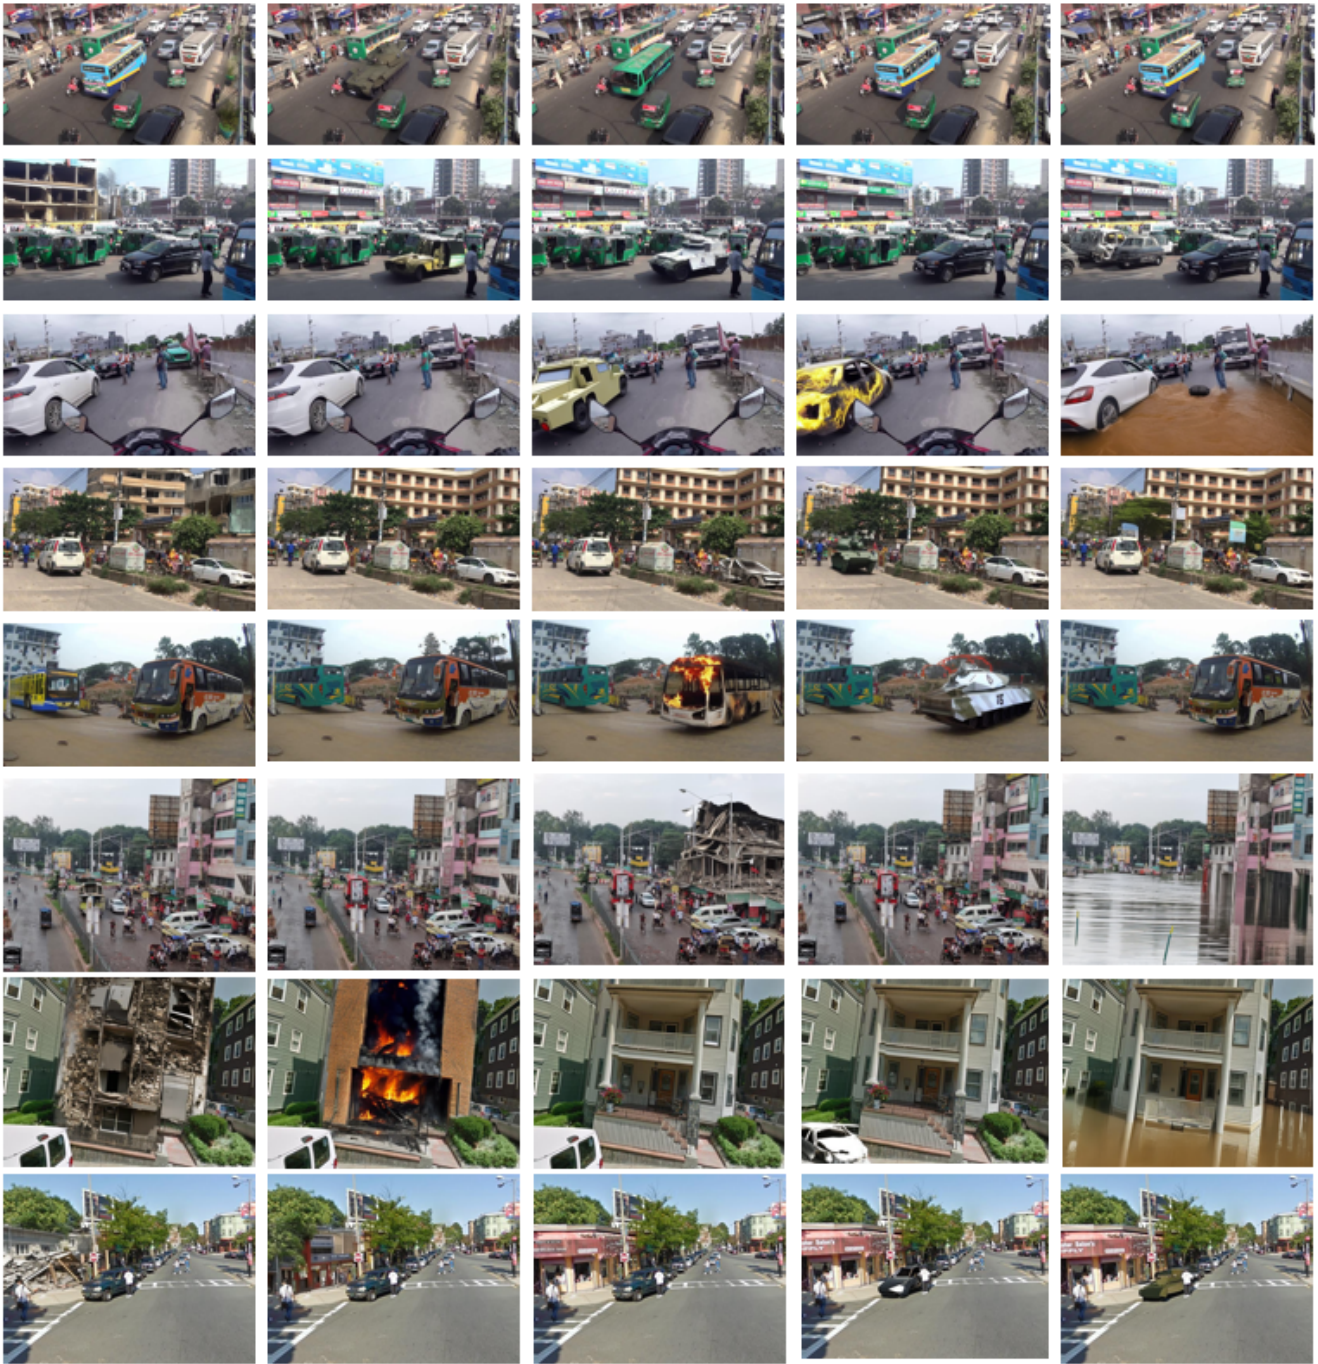

702  
703  
704  
705  
706  
707  
708  
709  
710  
711  
712  
713  
714  
715  
716  
717  
718  
719  
720  
721  
722  
723  
724  
725  
726  
727  
728  
729  
730  
731  
732  
733  
734  
735  
736  
737  
738  
739  
740  
741  
742  
743  
744  
745  
746  
747  
748  
749  
750  
751  
752  
753  
754  
755

Figure A8. Examples of the manipulated images from our CSI-IMD gold standard set (4 of 10).

756  
757  
758  
759  
760  
761  
762  
763  
764  
765  
766  
767  
768  
769  
770  
771  
772  
773  
774  
775  
776  
777  
778  
779  
780  
781  
782  
783  
784  
785  
786  
787  
788  
789  
790  
791  
792  
793  
794  
795  
796  
797  
798  
799  
800  
801  
802  
803  
804  
805  
806  
807  
808  
809

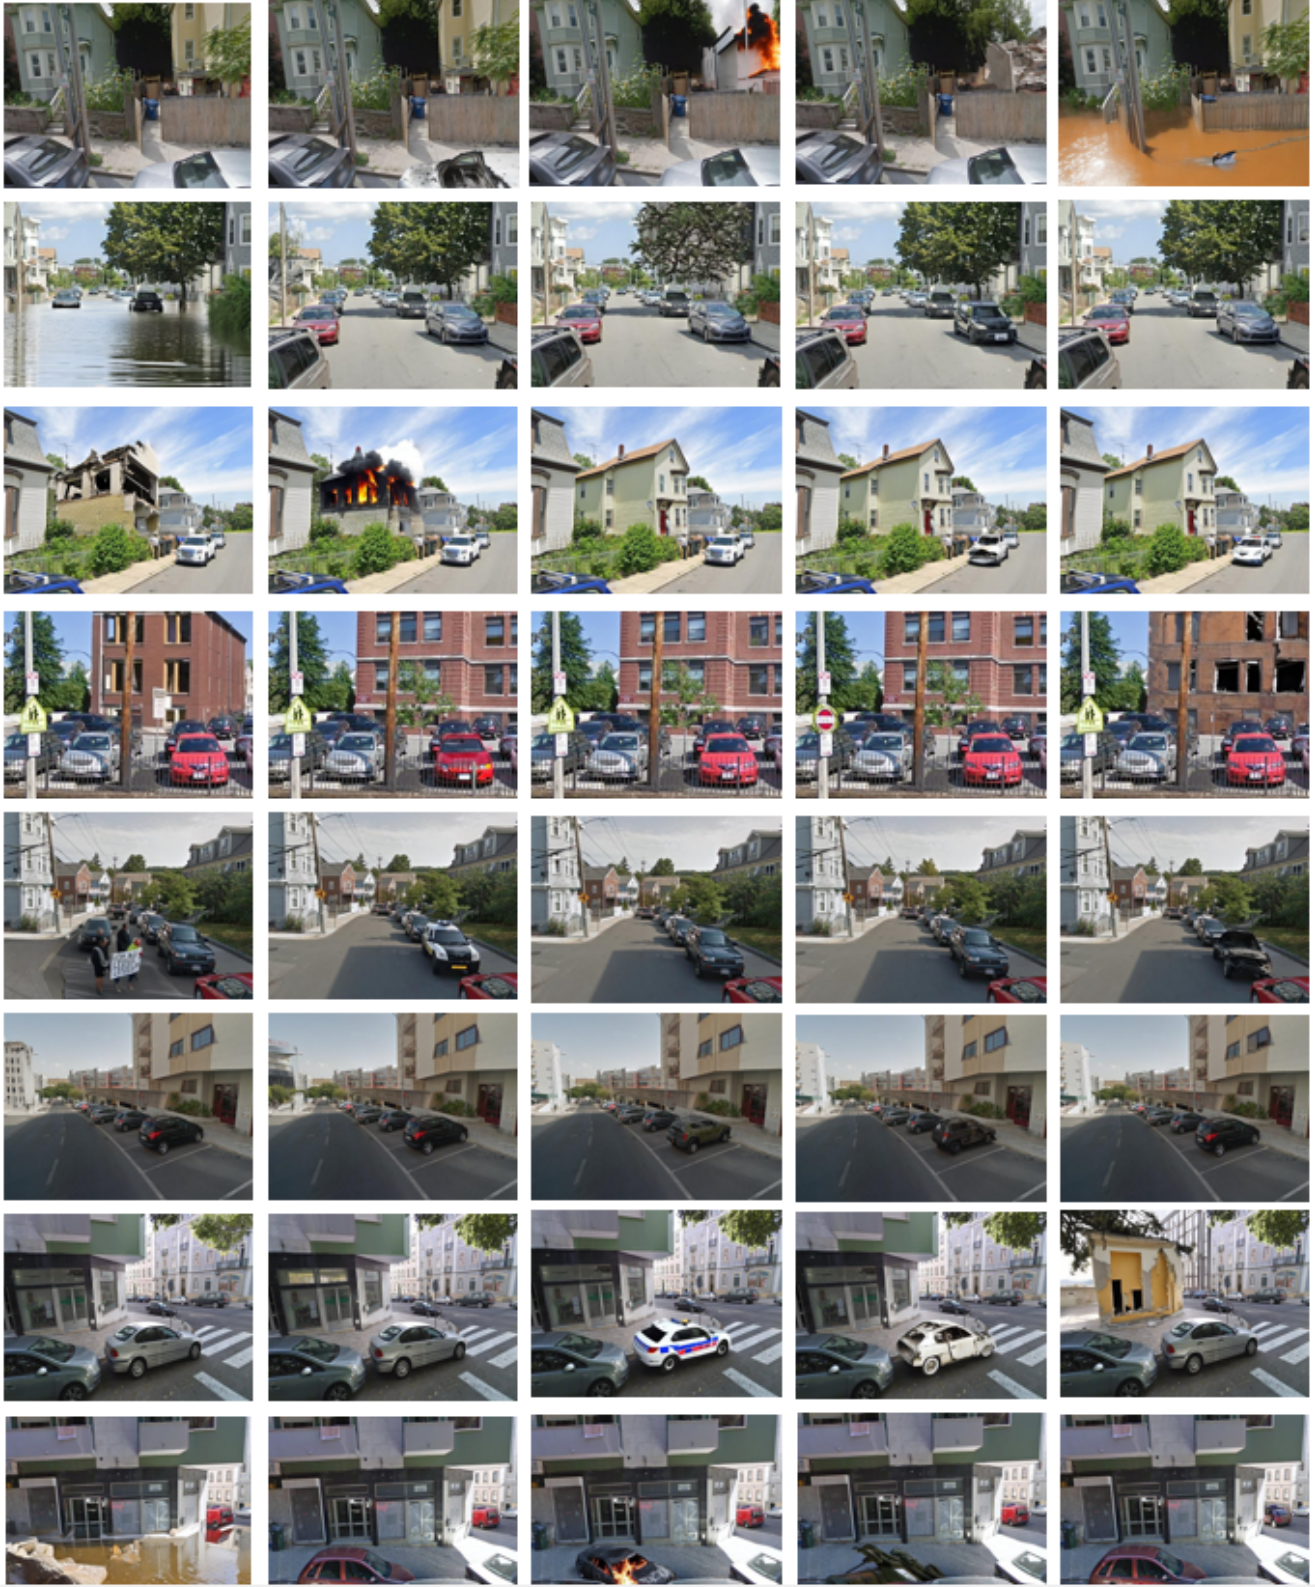

810  
811  
812  
813  
814  
815  
816  
817  
818  
819  
820  
821  
822  
823  
824  
825  
826  
827  
828  
829  
830  
831  
832  
833  
834  
835  
836  
837  
838  
839  
840  
841  
842  
843  
844  
845  
846  
847  
848  
849  
850  
851  
852  
853  
854  
855  
856  
857  
858  
859  
860  
861  
862  
863

Figure A9. Examples of the manipulated images from our CSI-IMD gold standard set (5 of 10).



864  
865  
866  
867  
868  
869  
870  
871  
872  
873  
874  
875  
876  
877  
878  
879  
880  
881  
882  
883  
884  
885  
886  
887  
888  
889  
890  
891  
892  
893  
894  
895  
896  
897  
898  
899  
900  
901  
902  
903  
904  
905  
906  
907  
908  
909  
910  
911  
912  
913  
914  
915  
916  
917

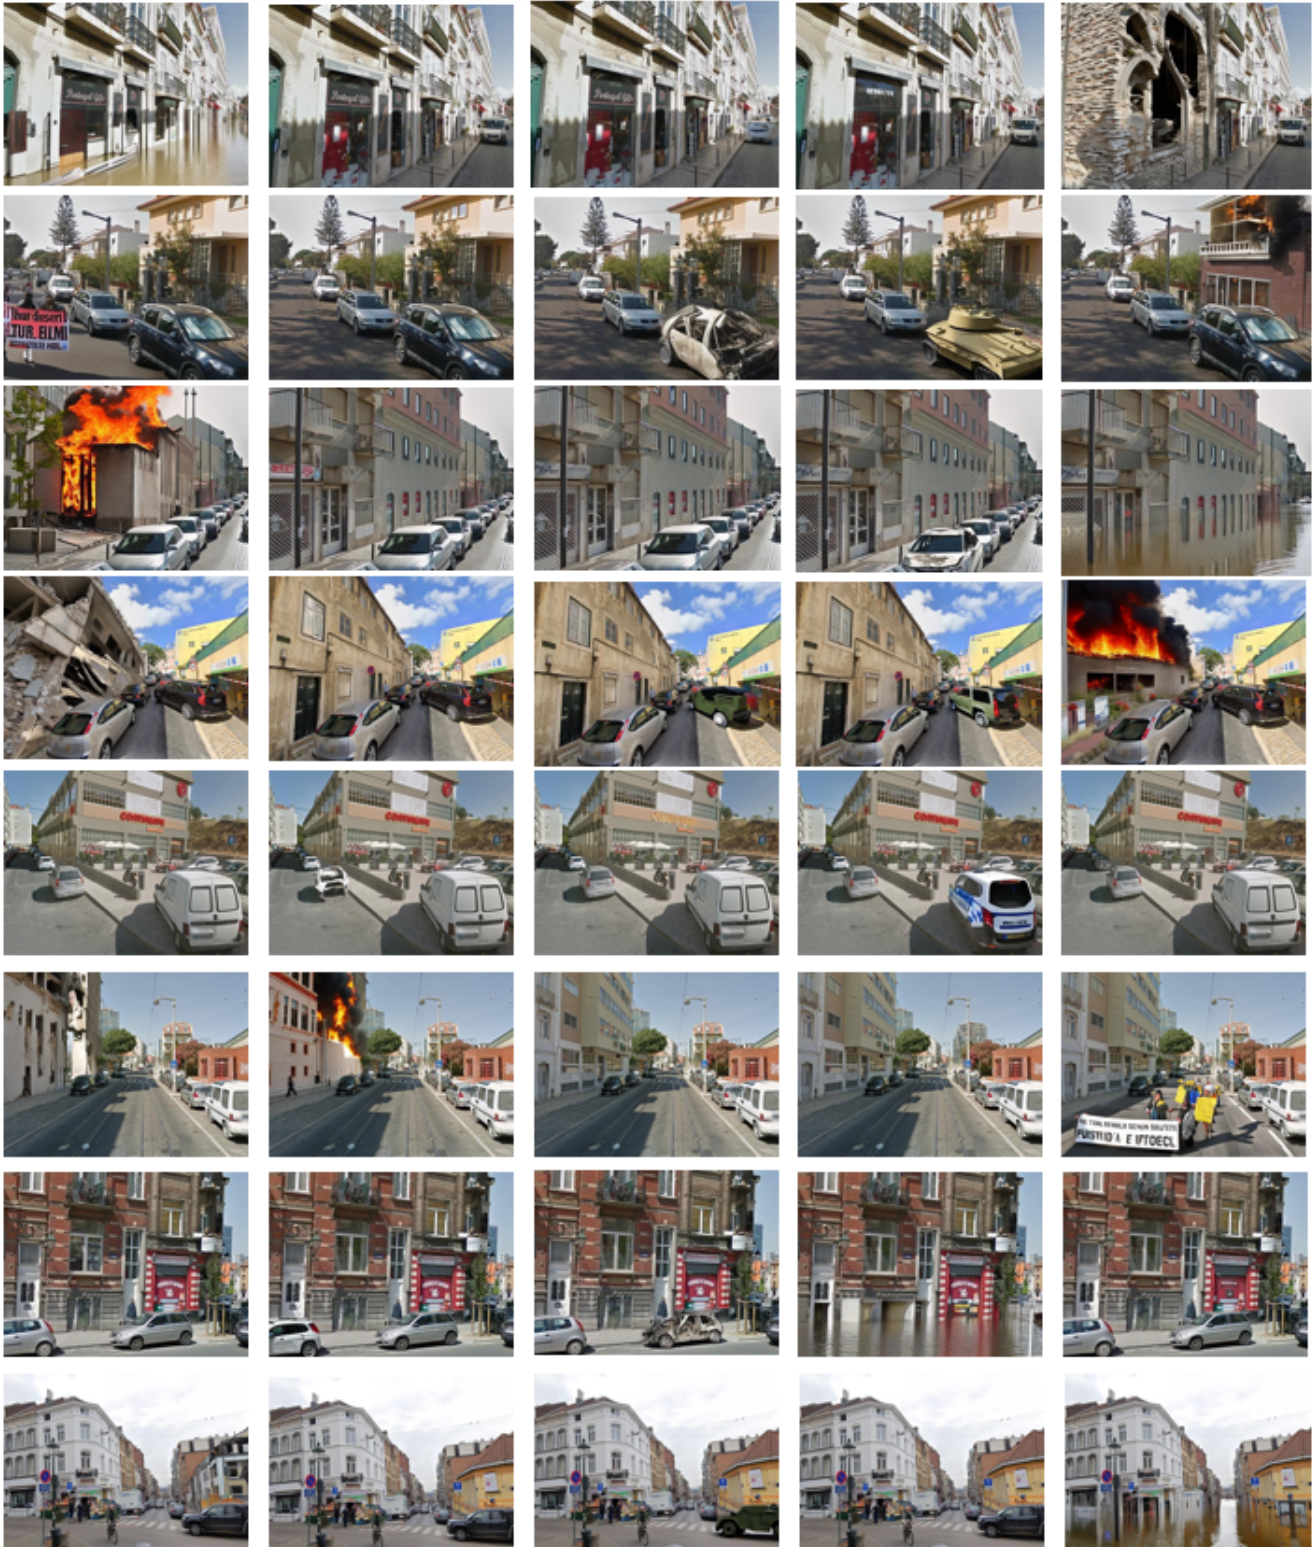

918  
919  
920  
921  
922  
923  
924  
925  
926  
927  
928  
929  
930  
931  
932  
933  
934  
935  
936  
937  
938  
939  
940  
941  
942  
943  
944  
945  
946  
947  
948  
949  
950  
951  
952  
953  
954  
955  
956  
957  
958  
959  
960  
961  
962  
963  
964  
965  
966  
967  
968  
969  
970  
971

Figure A10. Examples of the manipulated images from our CSI-IMD gold standard set (6 of 10).

972  
973  
974  
975  
976  
977  
978  
979  
980  
981  
982  
983  
984  
985  
986  
987  
988  
989  
990  
991  
992  
993  
994  
995  
996  
997  
998  
999  
1000  
1001  
1002  
1003  
1004  
1005  
1006  
1007  
1008  
1009  
1010  
1011  
1012  
1013  
1014  
1015  
1016  
1017  
1018  
1019  
1020  
1021  
1022  
1023  
1024  
1025

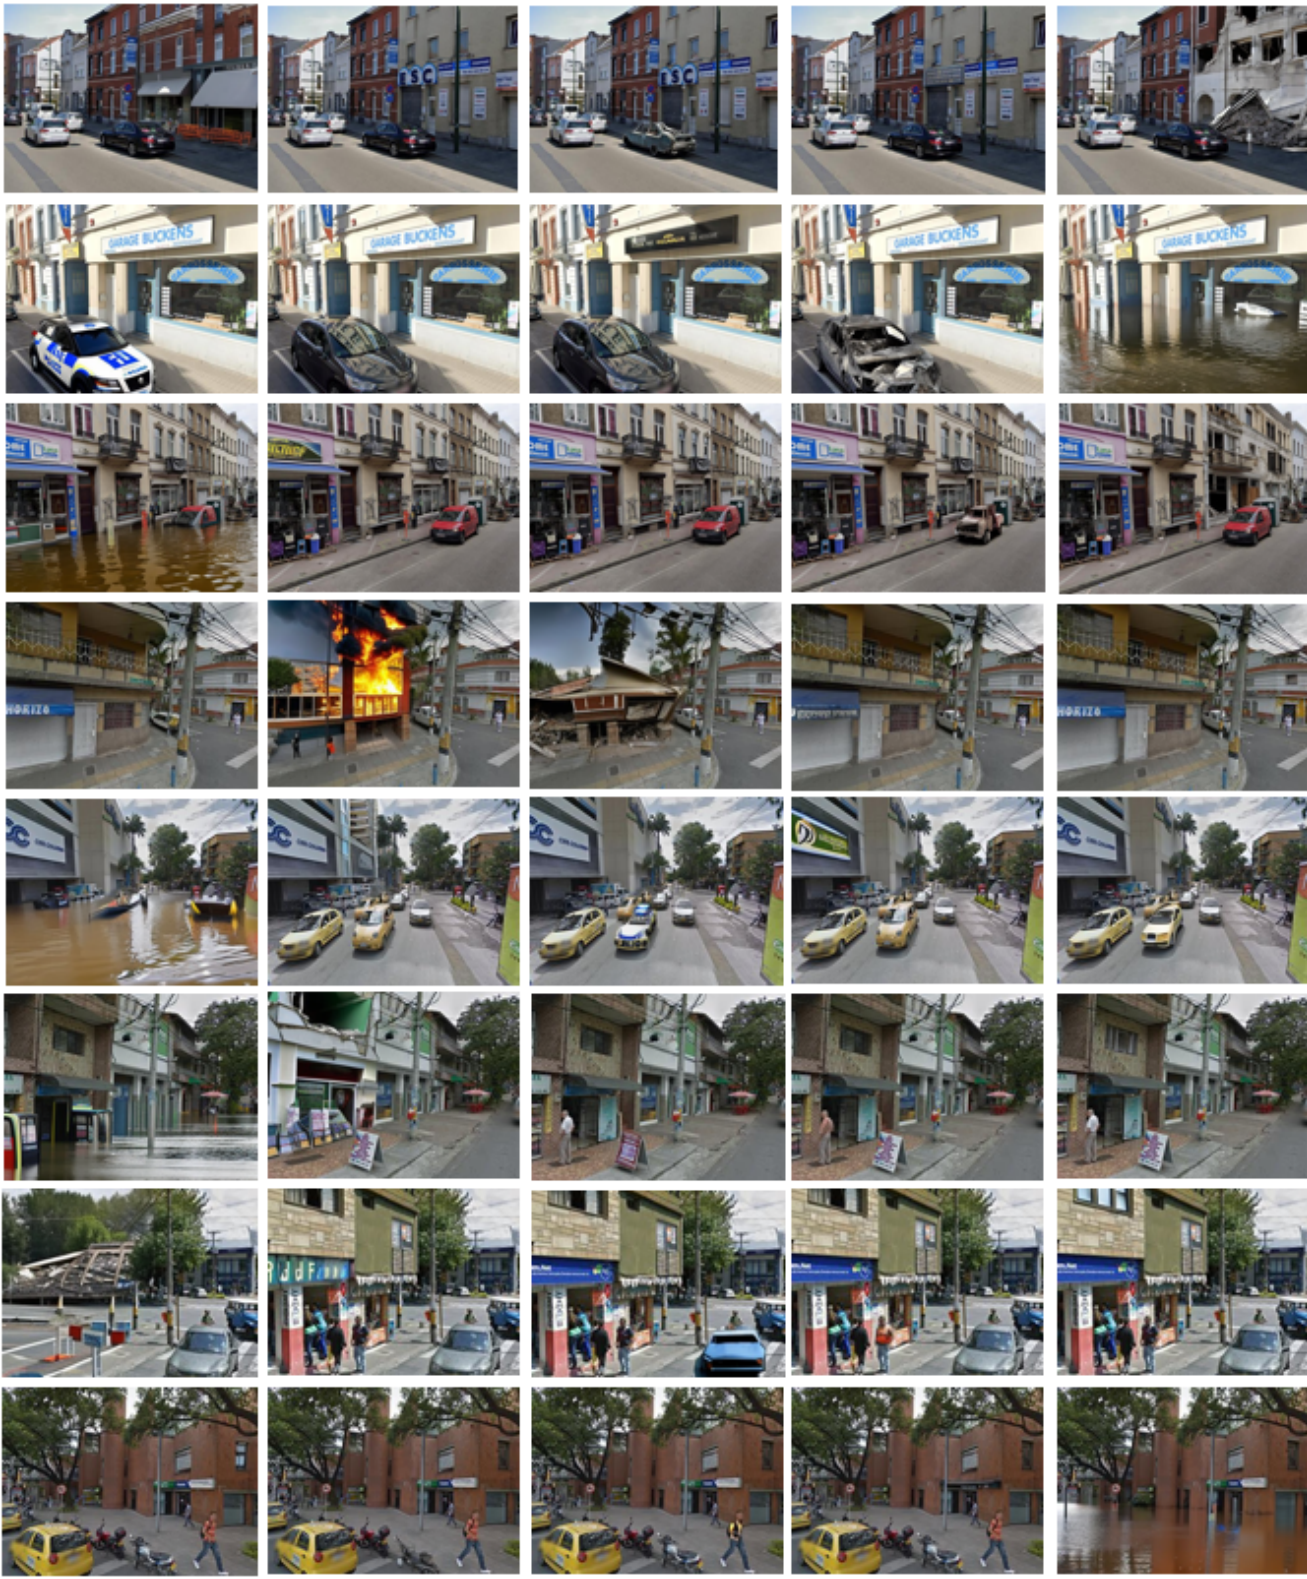

1026  
1027  
1028  
1029  
1030  
1031  
1032  
1033  
1034  
1035  
1036  
1037  
1038  
1039  
1040  
1041  
1042  
1043  
1044  
1045  
1046  
1047  
1048  
1049  
1050  
1051  
1052  
1053  
1054  
1055  
1056  
1057  
1058  
1059  
1060  
1061  
1062  
1063  
1064  
1065  
1066  
1067  
1068  
1069  
1070  
1071  
1072  
1073  
1074  
1075  
1076  
1077  
1078  
1079

Figure A11. Examples of the manipulated images from our CSI-IMD gold standard set (7 of 10).

1080  
1081  
1082  
1083  
1084  
1085  
1086  
1087  
1088  
1089  
1090  
1091  
1092  
1093  
1094  
1095  
1096  
1097  
1098  
1099  
1100  
1101  
1102  
1103  
1104  
1105  
1106  
1107  
1108  
1109  
1110  
1111  
1112  
1113  
1114  
1115  
1116  
1117  
1118  
1119  
1120  
1121  
1122  
1123  
1124  
1125  
1126  
1127  
1128  
1129  
1130  
1131  
1132  
1133

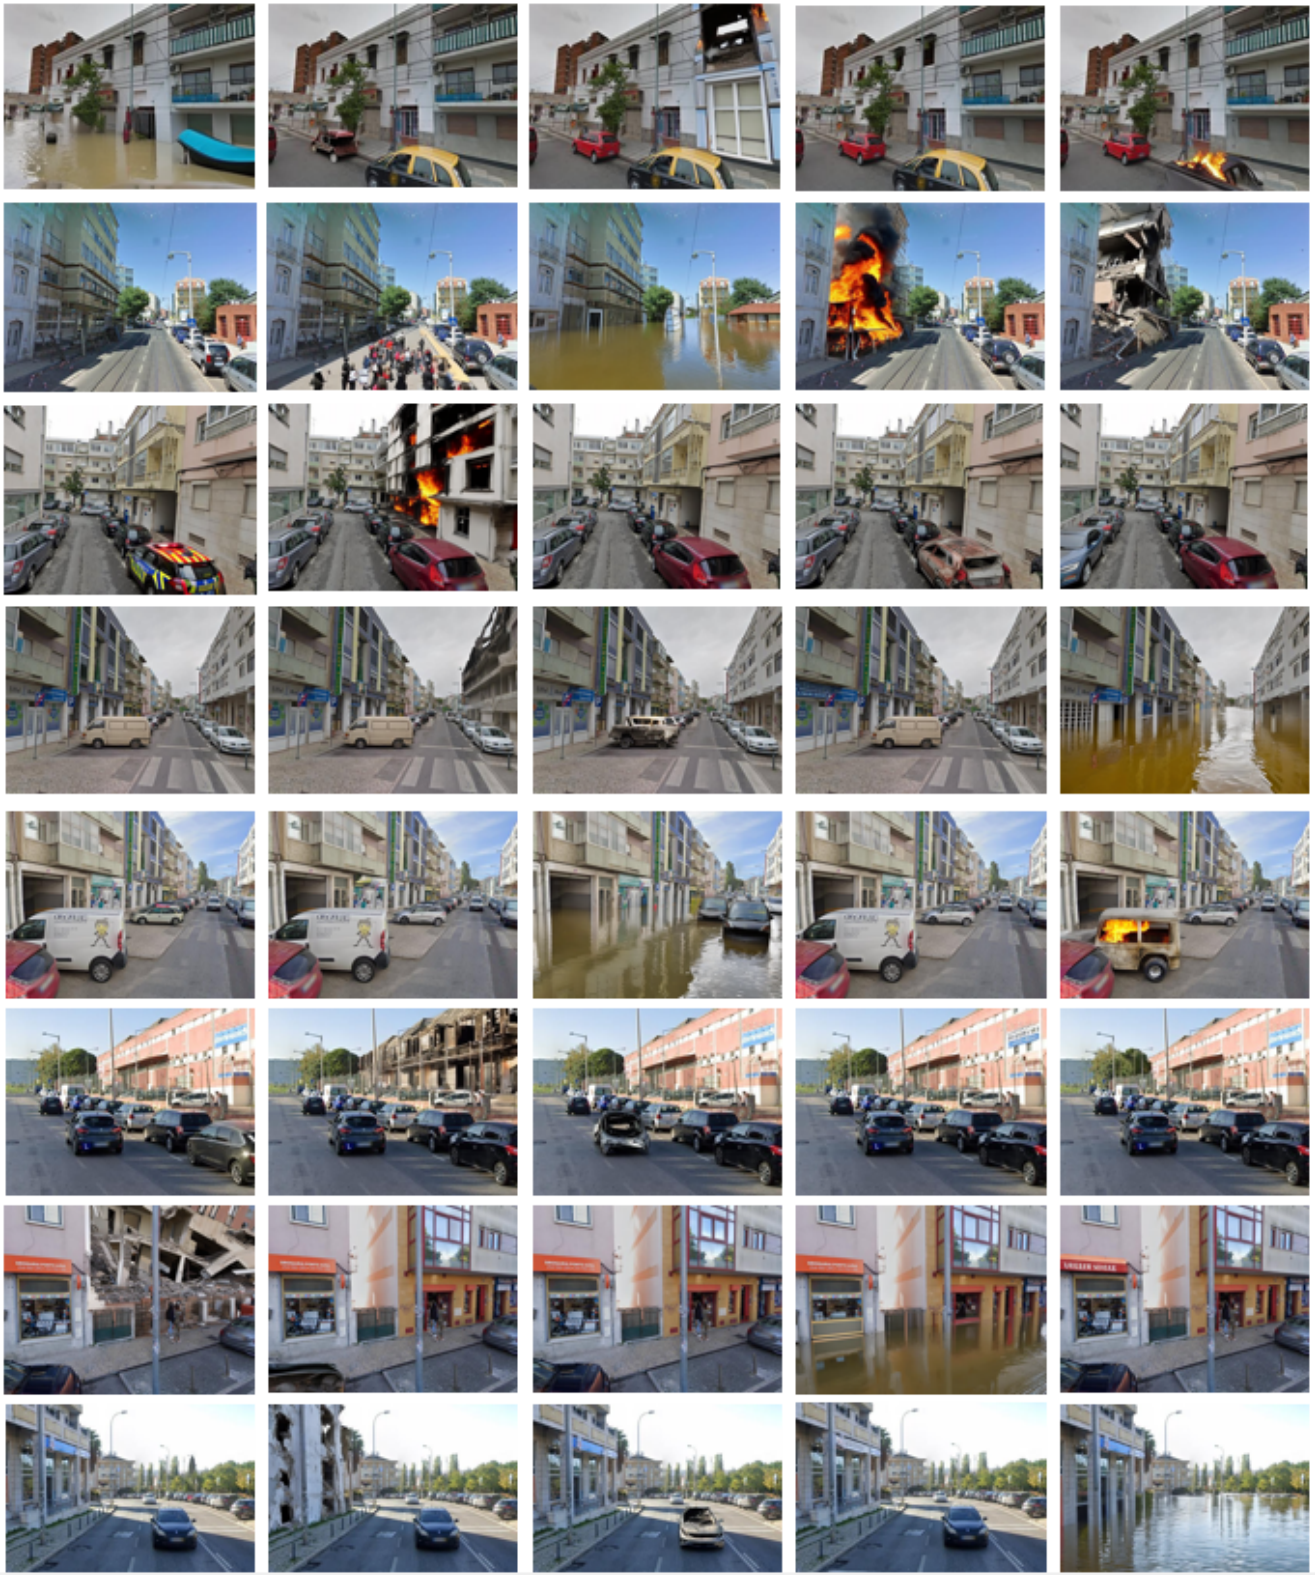

1134  
1135  
1136  
1137  
1138  
1139  
1140  
1141  
1142  
1143  
1144  
1145  
1146  
1147  
1148  
1149  
1150  
1151  
1152  
1153  
1154  
1155  
1156  
1157  
1158  
1159  
1160  
1161  
1162  
1163  
1164  
1165  
1166  
1167  
1168  
1169  
1170  
1171  
1172  
1173  
1174  
1175  
1176  
1177  
1178  
1179  
1180  
1181  
1182  
1183  
1184  
1185  
1186  
1187

Figure A12. Examples of the manipulated images from our CSI-IMD gold standard set (8 of 10).

1188  
1189  
1190  
1191  
1192  
1193  
1194  
1195  
1196  
1197  
1198  
1199  
1200  
1201  
1202  
1203  
1204  
1205  
1206  
1207  
1208  
1209  
1210  
1211  
1212  
1213  
1214  
1215  
1216  
1217  
1218  
1219  
1220  
1221  
1222  
1223  
1224  
1225  
1226  
1227  
1228  
1229  
1230  
1231  
1232  
1233  
1234  
1235  
1236  
1237  
1238  
1239  
1240  
1241

1242  
1243  
1244  
1245  
1246  
1247  
1248  
1249  
1250  
1251  
1252  
1253  
1254  
1255  
1256  
1257  
1258  
1259  
1260  
1261  
1262  
1263  
1264  
1265  
1266  
1267  
1268  
1269  
1270  
1271  
1272  
1273  
1274  
1275  
1276  
1277  
1278  
1279  
1280  
1281  
1282  
1283  
1284  
1285  
1286  
1287  
1288  
1289  
1290  
1291  
1292  
1293  
1294  
1295

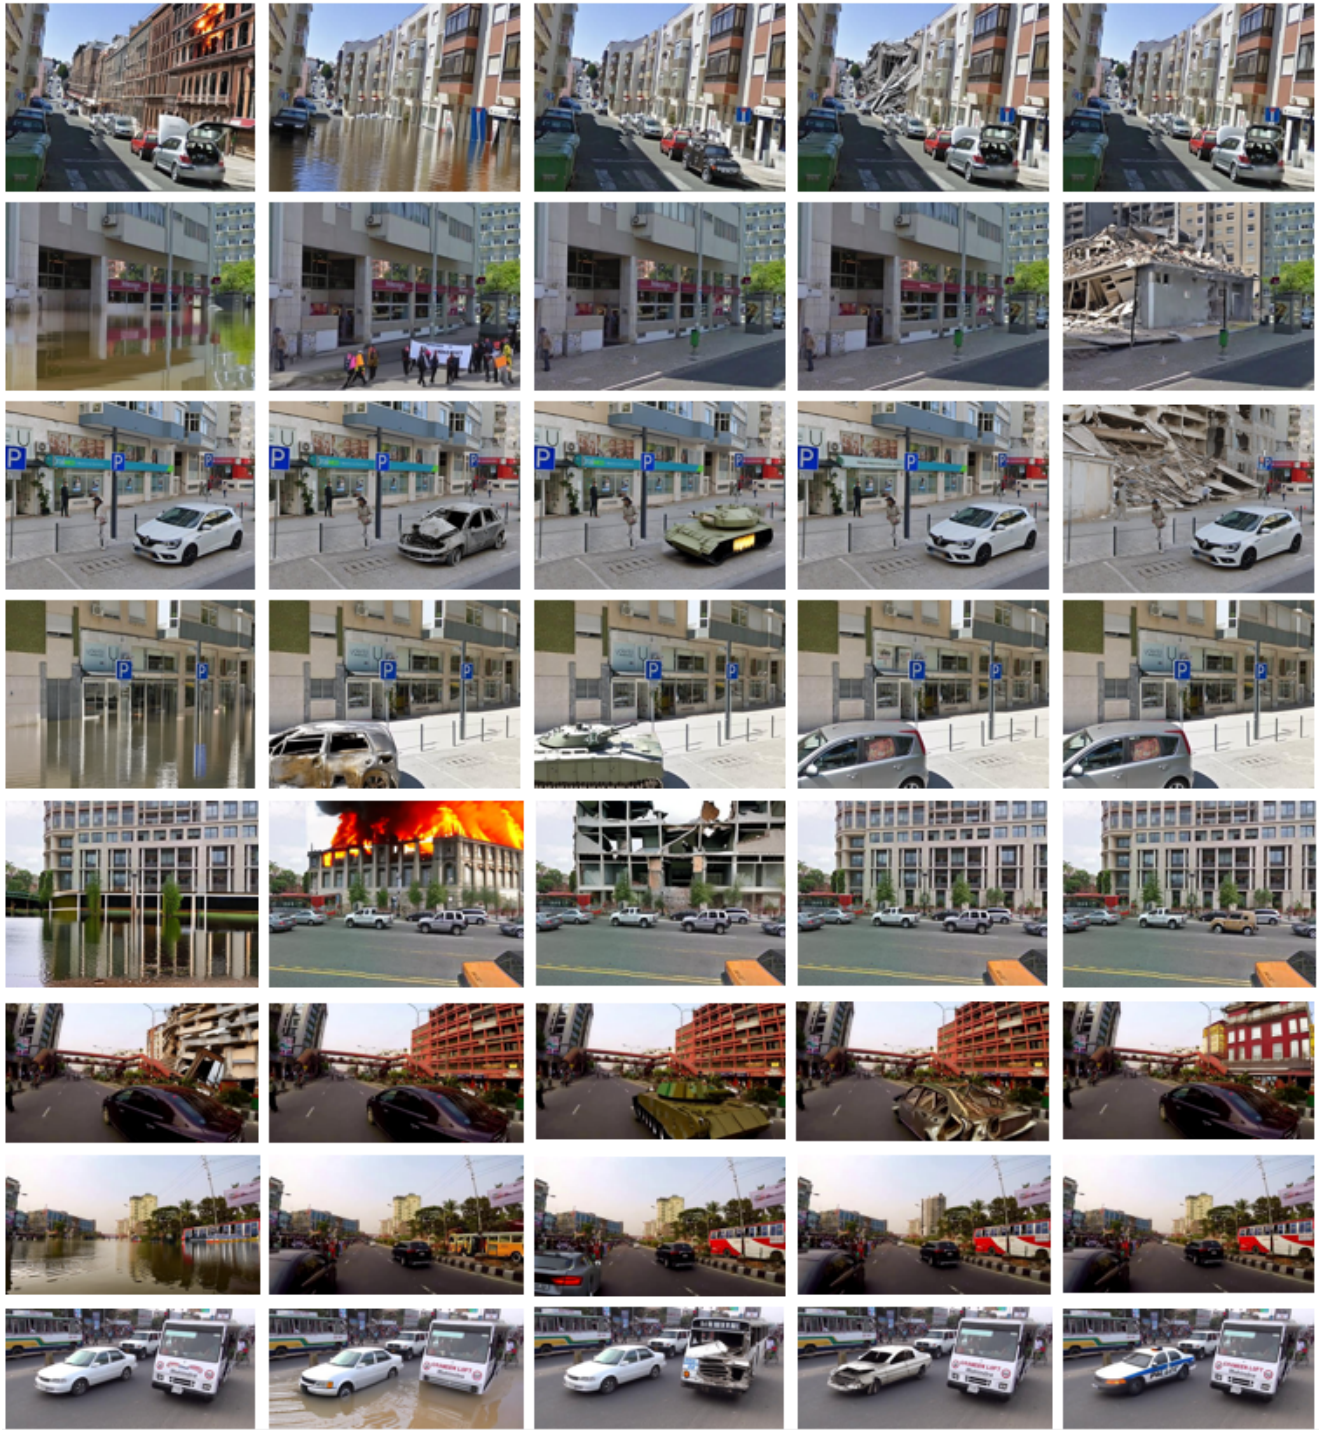

Figure A13. Examples of the manipulated images from our CSI-IMD gold standard set (9 of 10).

1296  
1297  
1298  
1299  
1300  
1301  
1302  
1303  
1304  
1305  
1306  
1307  
1308  
1309  
1310  
1311  
1312  
1313  
1314  
1315  
1316  
1317  
1318  
1319  
1320  
1321  
1322  
1323  
1324  
1325  
1326  
1327  
1328  
1329  
1330  
1331  
1332  
1333  
1334  
1335  
1336  
1337  
1338  
1339  
1340  
1341  
1342  
1343  
1344  
1345  
1346  
1347  
1348  
1349

1350  
1351  
1352  
1353  
1354  
1355  
1356  
1357  
1358  
1359  
1360  
1361  
1362  
1363  
1364  
1365  
1366  
1367  
1368  
1369  
1370  
1371  
1372  
1373  
1374  
1375  
1376  
1377  
1378  
1379  
1380  
1381  
1382  
1383  
1384  
1385  
1386  
1387  
1388  
1389  
1390  
1391  
1392  
1393  
1394  
1395  
1396  
1397  
1398  
1399  
1400  
1401  
1402  
1403

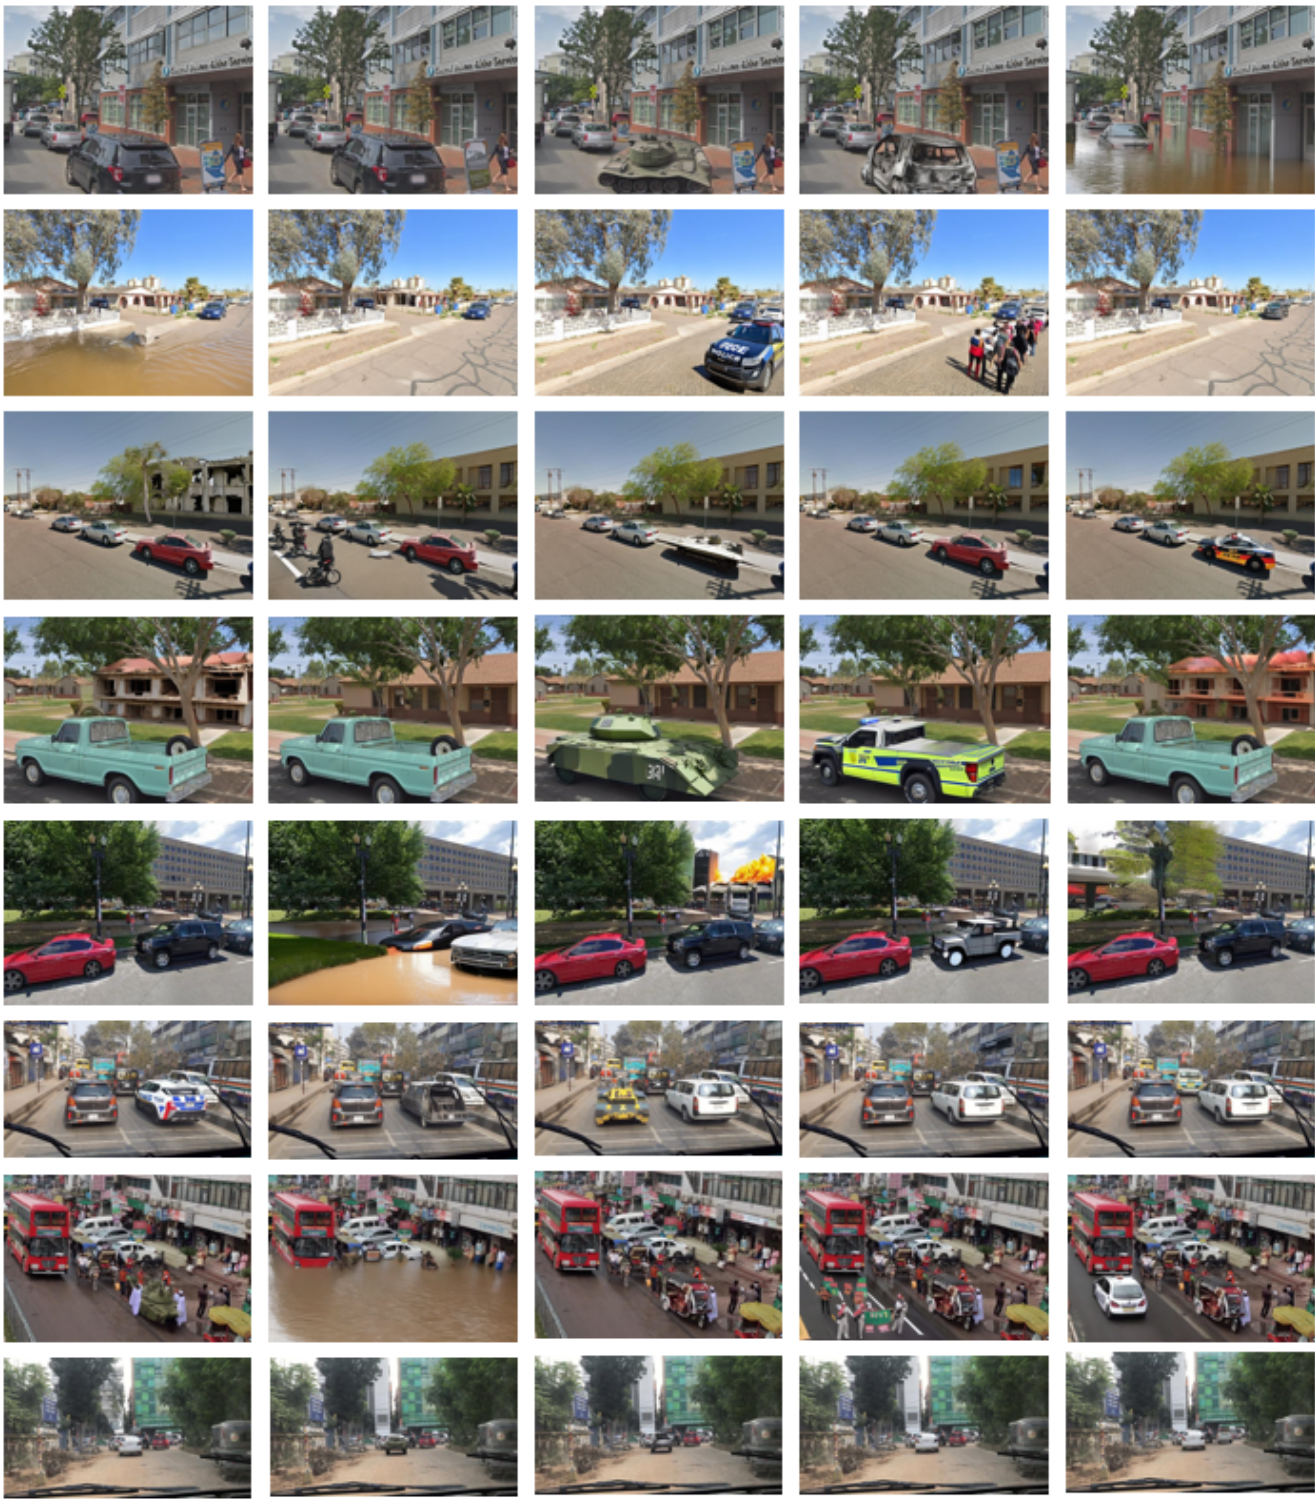

Figure A14. Examples of the manipulated images from our CSI-IMD gold standard set (10 of 10).

## References

- 1404  
1405  
1406 [1] Xiuli Bi, Yang Wei, Bin Xiao, and Weisheng Li. Rru-net: The ringed residual u-net for image splicing forgery detection. In *IEEE/CVF Conference on Computer Vision and Pattern Recognition Workshops*, 2019. 2, 3 1460  
1407  
1408  
1409  
1410  
1411 [2] Fabrizio Guillaro, Davide Cozzolino, Avneesh Sud, Nicholas Dufour, and Luisa Verdoliva. Trufor: Leveraging all-round clues for trustworthy image forgery detection and localization. *Conference on Computer Vision and Pattern Recognition (CVPR)*, 2023. 2, 3 1462  
1412  
1413  
1414  
1415  
1416 [3] Xiao Guo, Xiaohong Liu, Zhiyuan Ren, Steven Grosz, Iacopo Masi, and Xiaoming Liu. Hierarchical fine-grained image forgery detection and localization. In *Proceedings of the IEEE/CVF Conference on Computer Vision and Pattern Recognition*, pages 3155–3165, 2023. 2 1463  
1417  
1418  
1419  
1420  
1421 [4] Xuefeng Hu, Zhihan Zhang, Zhenye Jiang, Syomantak Chaudhuri, Zhenheng Yang, and Ram Nevatia. Span: Spatial pyramid attention network for image manipulation localization. In *European Conference on Computer Vision (ECCV)*, pages 312–328. Springer, 2020. 2 1464  
1422  
1423  
1424  
1425  
1426  
1427 [5] Myung-Joon Kwon, Seung-Hun Nam, In-Jae Yu, Heung-Kyu Lee, and Changick Kim. Learning jpeg compression artifacts for image manipulation detection and localization. *International Journal of Computer Vision (IJCV)*, 2022. 2, 3 1465  
1428  
1429  
1430  
1431  
1432  
1433 [6] Xiaohong Liu, Yaojie Liu, Jun Chen, and Xiaoming Liu. Pscn-net: Progressive spatio-channel correlation network for image manipulation detection and localization. *IEEE Transactions on Circuits and Systems for Video Technology*, 32(11):7505–7517, 2022. 2, 3 1466  
1434  
1435  
1436  
1437  
1438  
1439 [7] Junke Wang, Zuxuan Wu, Jingjing Chen, Xintong Han, Abhinav Shrivastava, Ser-Nam Lim, and Yungang Jiang. Objectformer for image manipulation detection and localization. In *IEEE/CVF Conference on Computer Vision and Pattern Recognition*, pages 2364–2373, 2022. 2 1467  
1440  
1441  
1442  
1443  
1444  
1445 [8] Haiwei Wu, Jiantao Zhou, Jinyu Tian, and Jun Liu. Robust image forgery detection over online social network shared images. In *IEEE/CVF Conference on Computer Vision and Pattern Recognition*, pages 13440–13449, 2022. 2, 3 1468  
1446  
1447  
1448  
1449  
1450  
1451 [9] Yue Wu, Wael AbdAlmageed, and Premkumar Natarajan. Mantra-net: Manipulation tracing network for detection and localization of image forgeries with anomalous features. *Conference on Computer Vision and Pattern Recognition (CVPR)*, 2019. 2, 3 1469  
1452  
1453  
1454  
1455  
1456  
1457 [10] Chao Yang, Huizhou Li, Fangting Lin, Bin Jiang, and Hao Zhao. Constrained r-cnn: A general image manipulation detection model. In *IEEE International Conference on Multimedia and Expo (ICME)*, pages 1–6. IEEE, 2020. 2 1470  
1471  
1472  
1473  
1474  
1475  
1476  
1477  
1478  
1479  
1480  
1481  
1482  
1483  
1484  
1485  
1486  
1487  
1488  
1489  
1490  
1491  
1492  
1493  
1494  
1495  
1496  
1497  
1498  
1499  
1500  
1501  
1502  
1503  
1504  
1505  
1506  
1507  
1508  
1509  
1510  
1511
